# Supplementary material for: Impact of leakage during HFC-125 production on the increase in HCFC-123 and HCFC-124 emissions
Source: Copernicus journal article supplement (doi:10.5194/acp-25-17761-2025), 2025-12-05
Supplement: Supplementary file 1 [file acp-25-17761-2025-supplement.pdf]

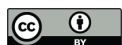

*Supplement of*

## **Impact of leakage during HFC-125 production on the increase in HCFC-123 and HCFC-124 emissions**

**Luke M. Western et al.**

*Correspondence to:* Luke M. Western (lwestern@mit.edu)

The copyright of individual parts of the supplement might differ from the article licence.

S1 Contamination of HCFC-124 in air conditioning unit leaks

To determine the magnitude of HCFC-124 impurity in HFC-125 refrigerant in a case-study frame, events of air conditioner leakages at six AGAGE measurement sites (i.e. Trinidad Head, Ragged Point, Mace Head, Cape Matatula, Cape Grim, and Tacolneston), and at an additional, urban site (Aspendale), were evaluated for the years 2008-2024. Events of air conditioner leakage were identified by excess mole fractions of HFC-125 and HFC-32 (components of the R-410A refrigerant blend, HFC-125/HFC-32 ratio of 50%/50% by mass) in laboratory air measurements, as compared to ambient atmospheric mole fractions. Leakage events were additionally subdivided based on documented air conditioner servicing (including refrigerant refilling) and air conditioner replacements. HCFC-124/HFC-125 ratios and correlations varied across leakage events. Six events at a total of three sites (i.e. Trinidad Head, Ragged Point, and Mace Head), showed strong correlation ( $r > 0.7$ ,  $R^2 > 0.5$ ), and positive regression slopes. The range of these six events indicate HCFC-124 impurities of  $5.5 \times 10^{-4}$  (to be considered zero) to  $4.6 \times 10^{-2}\%$  by mass. For the other 70% of investigated events an HCFC-124 impurity was not demonstrable (with  $r < 0.6$ ,  $R^2 < 0.4$ ). For these events, the lowest HCFC-124/HFC-125 ratio was  $2.3 \times 10^{-5}\%$  (to be considered zero) by mass.

S2 Supplementary Table

| Measurement site                          | Latitude | Longitude | Network     | Gas                | Region         |
|-------------------------------------------|----------|-----------|-------------|--------------------|----------------|
| Alert, Nunavut, Canada                    | 82.5° N  | 62.5° W   | NOAA        | HCFC-123, HCFC-124 | Global         |
| Zeppelin, Svalbard, Norway                | 78.9° N  | 11.9° E   | AGAGE       | HCFC-124           | Europe         |
| Summit, Greenland                         | 72.6° N  | 38.4° W   | NOAA        | HCFC-123, HCFC-124 | Global         |
| Barrow, Alaska, USA                       | 71.3° N  | 156.6° W  | NOAA        | HCFC-123, HCFC-124 | Global         |
| Mace Head, Ireland                        | 53.3° N  | 9.9° W    | AGAGE, NOAA | HCFC-124           | Global, Europe |
| Tacolneston, UK                           | 52.5° N  | 1.1° E    | AGAGE       | HCFC-124           | Europe         |
| Taunus, Germany                           | 50.2° N  | 8.4° E    | AGAGE       | HCFC-124           | Europe         |
| Jungfrauoch, Switzerland                  | 46.5° N  | 8.0° E    | AGAGE       | HCFC-124           | Europe         |
| Monte Cimone, Italy                       | 44.2° N  | 10.7° E   | AGAGE       | HCFC-124           | Europe         |
| Niwot Ridge, Colorado, USA                | 40.1° N  | 105.6° W  | NOAA        | HCFC-123, HCFC-124 | Global         |
| Trinidad Head, California, USA            | 41.0° N  | 124.1° W  | AGAGE, NOAA | HCFC-124           | Global         |
| Gosan, South Korea                        | 33.3° N  | 126.2° E  | AGAGE       | HCFC-124           | East Asia      |
| Mauna Loa, Hawaii, USA                    | 19.5° N  | 155.6° W  | NOAA        | HCFC-123, HCFC-124 | Global         |
| Cape Matatula, American Samoa             | 14.2° S  | 170.6° W  | AGAGE, NOAA | HCFC-123, HCFC-124 | Global         |
| Kennaook / Cape Grim, Tasmania, Australia | 40.7° S  | 144.7° E  | AGAGE, NOAA | HCFC-123, HCFC-124 | Global         |
| Palmer Station, Antarctica                | 64.8° S  | 64.1° W   | NOAA        | HCFC-123, HCFC-124 | Global         |
| South Pole, Antarctica                    | 90.0° S  |           | NOAA        | HCFC-123, HCFC-124 | Global         |

**Table S1.** The location from which air was measured in this study using regular sampling. The column detailing the ‘region of emissions quantification’ shows for which region the measurements were used to derive emissions. Additional measurements of archived air were measured from Kennaook / Cape Grim, Niwot Ridge, Trinidad Head and Scripps Institution of Oceanography, California USA (32.9° N, 117.3° W) (see main text).
